# Supplementary figures and images for: Copper(II) Etioporphyrinate as a Promising Photoluminescent and Electroluminescent Temperature Sensor
Source: MDPI journal article supplement (doi:10.3390/ijms231810961), 2022-09-19

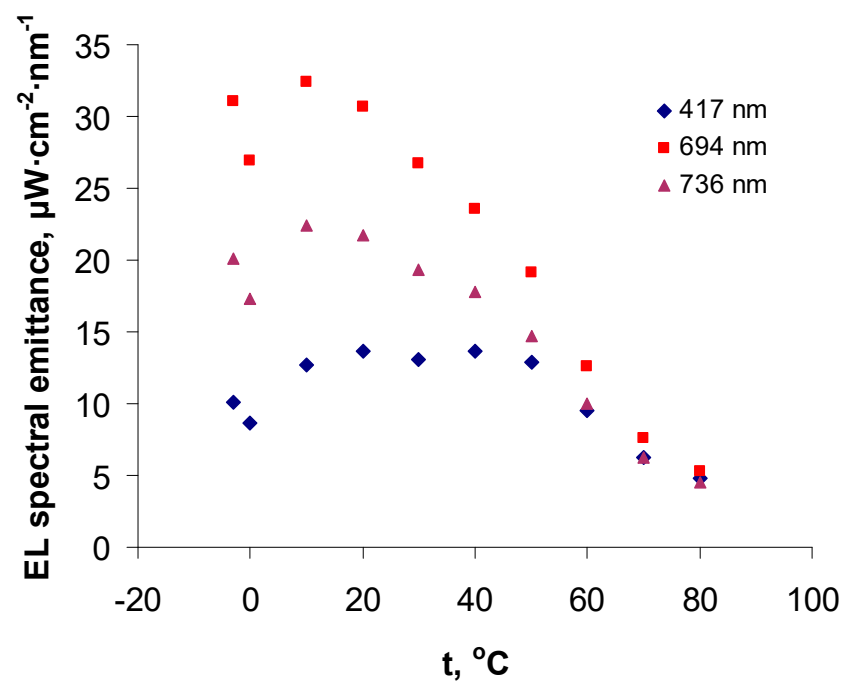

Figure S1. Temperature dependence of EL intensity at band maxima 417, 694 и 736 nm.

Supplement: s1 [file s1]
